# Supplementary material
Source: ML conference proceedings conference paper supplement (https://openaccess.thecvf.com/content/CVPR2022/html/Zhou_Towards_Language-Free_Training_CVPR_2022_paper.html)
Supplement: Supplementary file 1 [file Zhou_Towards_Language-Free_Training_CVPR_2022_supplemental.pdf]

## A. Appendix

### A.1. Theoretical Results

**Theorem 1.** For a given threshold  $c > 0$ , the generated text feature by LAFITEG satisfies  $\text{Sim}(f_{\text{img}}(\mathbf{x}_i), \mathbf{h}'_i) \geq c$  with probability at least

$$\text{Prob}(\text{Sim}(f_{\text{img}}(\mathbf{x}_i), \mathbf{h}'_i) \geq c) = 1 - \int_{-1}^{(c-1)/\xi+c} \frac{\Gamma(d/2 + 1/2)}{\sqrt{\pi}\Gamma(d/2)} (1 - x^2)^{d/2-1} dx$$

where  $d$  is the dimension number of features,  $\Gamma(z) = \int_0^\infty x^{z-1} e^{-x} dx$  is the Gamma function.

*Proof.* Without loss of generality, we omit the subscript for clearness.

$$\begin{aligned} \text{Sim}(f_{\text{img}}(\mathbf{x}), \mathbf{h}') &= \frac{\langle f_{\text{img}}(\mathbf{x}), \mathbf{h}' \rangle}{\|f_{\text{img}}(\mathbf{x})\|_2 \|\mathbf{h}'\|_2} \\ &= \frac{\langle f_{\text{img}}(\mathbf{x}), f_{\text{img}}(\mathbf{x}) + \xi \epsilon \|f_{\text{img}}(\mathbf{x})\|_2 / \|\epsilon\|_2 \rangle}{\|f_{\text{img}}(\mathbf{x})\|_2 \|f_{\text{img}}(\mathbf{x}) + \xi \epsilon \|f_{\text{img}}(\mathbf{x})\|_2 / \|\epsilon\|_2\|_2} \\ &= \frac{\|f_{\text{img}}(\mathbf{x})\|^2 + \xi \epsilon^\top f_{\text{img}}(\mathbf{x}) \|f_{\text{img}}(\mathbf{x})\|_2 / \|\epsilon\|_2}{\|f_{\text{img}}(\mathbf{x})\|_2 \|f_{\text{img}}(\mathbf{x}) + \xi \epsilon \|f_{\text{img}}(\mathbf{x})\|_2 / \|\epsilon\|_2\|_2} \end{aligned}$$

Denote  $a = f_{\text{img}}(\mathbf{x}) / \|f_{\text{img}}(\mathbf{x})\|_2$ ,  $b = \epsilon / \|\epsilon\|_2$ , then we have

$$\begin{aligned} \text{Sim}(f_{\text{img}}(\mathbf{x}), \mathbf{h}') &= \frac{\|f_{\text{img}}(\mathbf{x})\|^2 + \xi \epsilon^\top f_{\text{img}}(\mathbf{x}) \|f_{\text{img}}(\mathbf{x})\|_2 / \|\epsilon\|_2}{\|f_{\text{img}}(\mathbf{x})\|_2 \|f_{\text{img}}(\mathbf{x}) + \xi \epsilon \|f_{\text{img}}(\mathbf{x})\|_2 / \|\epsilon\|_2\|_2} \\ &= \frac{1 + \xi a^\top b}{\|a + \xi b\|_2} \\ &\geq \frac{1 + \xi a^\top b}{\|a\|_2 + \xi \|b\|_2} \\ &= \frac{1 + \xi a^\top b}{1 + \xi} \end{aligned}$$

Consequently,

$$\begin{aligned} &\text{Prob}(\text{Sim}(f_{\text{img}}(\mathbf{x}_i), \mathbf{h}'_i) \geq c) \\ &\geq \text{Prob}\left(\frac{1 + \xi a^\top b}{1 + \xi} \geq c\right) \\ &= \text{Prob}(1 + \xi a^\top b \geq c + c\xi) \\ &= \text{Prob}(a^\top b \geq (c - 1 + c\xi)/\xi) \end{aligned}$$

By the cumulative distribution function (CDF) of inner product of random vectors on sphere [3], we know that

$$\text{Prob}(a^\top b \leq z) = \int_{-1}^z \frac{\Gamma(d/2 + 1/2)}{\sqrt{\pi}\Gamma(d/2)} (1 - x^2)^{d/2-1} dx$$

| Dataset      | #train | #validation | caption/image |
|--------------|--------|-------------|---------------|
| MS-COCO      | 82k    | 40k         | 5             |
| CUB          | 9k     | 3k          | 10            |
| LN-COCO      | 134k   | 8k          | 1             |
| MM CelebA-HQ | 24k    | 6k          | 10            |

Table 7. Statistics of datasets. The last column indicates ratio of captions vs images.

where  $d$  is the dimension number of features,  $\Gamma(z) = \int_0^\infty x^{z-1} e^{-x} dx$  is the Gamma function. Thus we have

$$\begin{aligned} &\text{Prob}(\text{Sim}(f_{\text{img}}(\mathbf{x}_i), \mathbf{h}'_i) \geq c) \\ &\geq \text{Prob}(a^\top b \geq (c - 1 + c\xi)/\xi) \\ &= 1 - \int_{-1}^{(c-1)/\xi+c} \frac{\Gamma(d/2 + 1/2)}{\sqrt{\pi}\Gamma(d/2)} (1 - x^2)^{d/2-1} dx, \end{aligned}$$

which completes the proof.  $\square$

### A.2. Experiment Details

**Datasets** The statistics of datasets are summarized in Table 7.

#### Algorithm 2 Image feature extraction process

```

1: Input: An image dataset  $\{\mathbf{x}_i\}_{i=1}^N$ , image resolution  $w \times w$ , pre-trained  $f_{\text{img}}$ , hyper-parameters  $a > 0, k \geq 1$ 
2: // Image feature generation
3: for  $i = 1$  to  $n$  do
4:   if use data augmentation then
5:     Initialize  $\mathbf{h}'_i \leftarrow \mathbf{0}$ ;
6:     for  $j = 1$  to  $k$  do
7:        $\mathbf{h}'_i \leftarrow \mathbf{h}'_i + f_{\text{img}}(\text{CROP}(\mathbf{x}_i))$ , where  $\text{CROP}(\cdot)$  denotes randomly cropping image to be  $w' \times w'$ ,  $w'$  is an integer randomly sampled from the range  $[a, w]$ ;
8:     end for
9:      $\mathbf{h}'_i \leftarrow \mathbf{h}'_i / k$ ;
10:  else
11:    Initialize  $\mathbf{h}'_i \leftarrow f_{\text{img}}(\mathbf{x}_i)$ ;
12:  end if
13: end for

```

**Image feature extraction** In practice, we use random cropping as data augmentation when we extract the image features, which is presented in Algorithm 2. The pseudo text features will be generated by perturb the average feature of augmented samples. In our implementation, we set  $k = 1, a = 256$  to extract image features used in generating  $\mathbf{h}'$ , while we set  $k = 1, a = 128$  in contrastive loss (7).

| RoF | SA | FID ↓ | IS ↑  | SOA-C ↑ | SOA-I ↑ |
|-----|----|-------|-------|---------|---------|
| ✓   |    | 24.85 | 23.74 | 30.54   | 48.72   |
|     | ✓  | 25.42 | 21.14 | 23.14   | 38.32   |
| ✓   | ✓  | 18.04 | 27.20 | 36.84   | 54.16   |

Table 8. Ablation study on discriminator logits in language-free setting. **RoF** denotes “real or fake” term, **SA** denotes “semantic alignment” term.

**Hyper-parameter** The hyper-parameters are selected based on the performance on MS-COCO dataset. Specifically,  $\tau$  is selected from  $[0.1, 0.2, 0.5, 1.0, 2.0]$ ,  $\lambda, \gamma$  are selected from  $[0, 1, 2, 5, 10, 20, 50]$ .

**Exponential sharpening** In practice, we found that applying an extra exponential sharpening in contrastive loss makes it easier to reproduce the experiment results, i.e. we add an extra exponential operation right before the softmax function in (6) and (7). Our implementation can be found at <https://github.com/drboog/Lafite>.

### A.3. More Results

We provide the implementation details of image generation with multi-modal conditions, an ablation study on discriminator, and more generated examples under language-free setting.

**Generation with multi-modal conditions** To generate an image conditioned on both a reference image and text description, we first extract the text feature  $\mathbf{h}_1$  from the given text, and pseudo text feature  $\mathbf{h}'_2$  from the image. Then  $\mathbf{h}_1, \mathbf{h}'_2$  will be feed into the pre-trained generator, leading to two conditional style codes  $\mathbf{u}_1$  and  $\mathbf{u}_2$ . We construct a new conditional style code, whose elements are randomly selected from the corresponding elements in either  $\mathbf{u}_1$  or  $\mathbf{u}_2$ . The new conditional style code will be fed into the generator to generate the desired image.

Note that generation conditioned on image is not reconstruction. Thus when only a reference image is provided, the generated image may have differences with the given image. However, they will share some visible characteristics that are semantic meaningful as illustrated in our examples.

**Ablation study on discriminator** We test the impact of each term of 4 under language-free setting. The results are provided in Table 8, from which we can see that both terms are important, while the “real or fake” term seems to be more important.

**Generated examples** Some text-to-image generation results on CUB, MS-COCO, MM CelebA-HQ, LN-COCO are provided in the following figures.

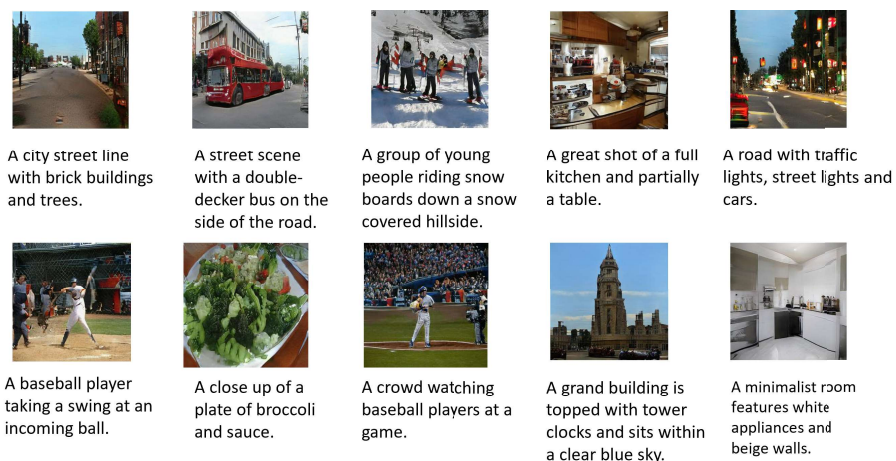

Figure 8. Generating examples on MS-COCO dataset.

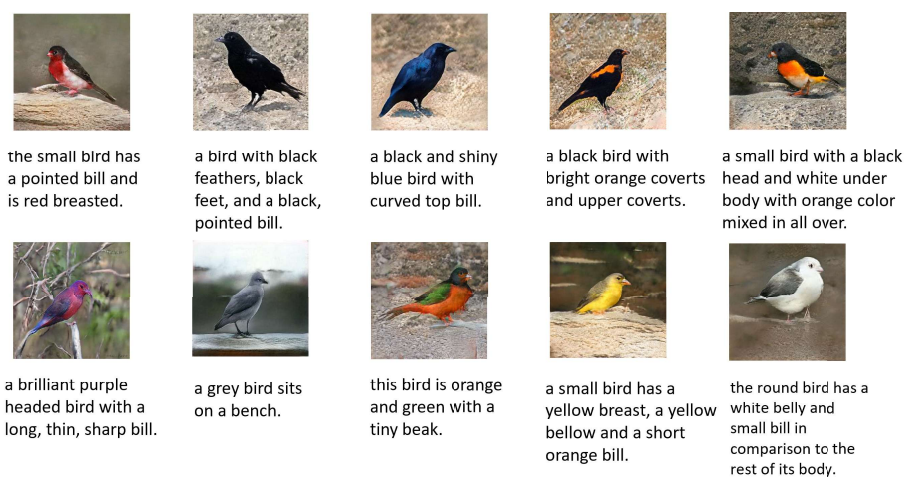

Figure 9. Generating examples on CUB dataset.

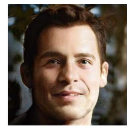

He has bags under eyes, and big nose. He is young.

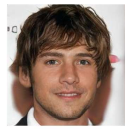

He has bangs, mouth slightly open, big nose, and brown hair. He is young, and attractive.

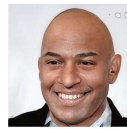

He is bald, and smiling and has big nose.

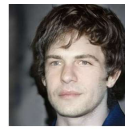

He has pale skin. He is attractive. He has no beard.

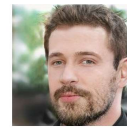

He is young and has goatee, and oval face.

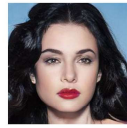

She has arched eyebrows, and big lips and wears heavy makeup, and lipstick.

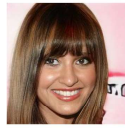

She has bangs. She wears heavy makeup. She is smiling, and attractive.

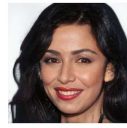

The woman has arched eyebrows, mouth slightly open, black hair, high cheekbones, wavy hair, and pointy nose. She is wearing lipstick.

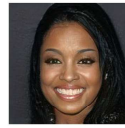

This woman has mouth slightly open. She wears lipstick. She is smiling.

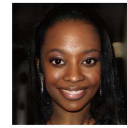

The woman has arched eyebrows, mouth slightly open, big lips, high cheekbones, and bags under eyes. She is wearing earrings.

Figure 10. Generating examples on MM CelebA-HQ dataset.

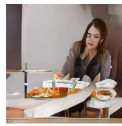

A woman is sitting on the chair at the table on which a full plate pizza and a tissue and fork are there. Behind her there is a wall.

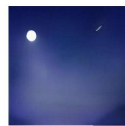

In this image I can see a aeroplane which is white in color flying in the air, and in the background I can see the sky and the moon..

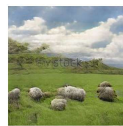

In this image we can see five sheep, in the front we can see some grass and some rocks, in the background we can see some trees, in the middle there is water, we can also see sky and clouds here.

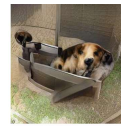

In the image we can see there is a dog who is sitting on the ground and there is a kennel, there is a dog bed in it and there is a dog bowl.

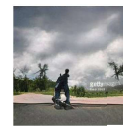

In this picture we can see a person skating on a skateboard, in the background we can see a shed, a pole, some of the trees here, on the top we can see a cloudy sky, this person wore a black color t-shirt.

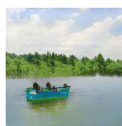

This is the picture of the river. There is a boat on the water. There are two persons and a dog in the boat and there is a flag at the end of the boat. At the back there are trees. At the top there is a sky. At the bottom there is a water.

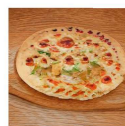

In the image there is a spring roll cheese pizza on a wooden plate and back of it there is another pizza on a wooden plate, Both are on floor.

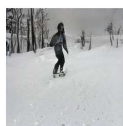

In the picture there is a snow, in a which a person is diving in the snow with the skateboard, there are many trees covered with the snow, there are mountains, there is a clear sky.

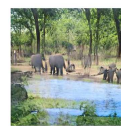

This is a picture taken in the outdoors. It is sunny. There are group of elephants drinking water in the river. Behind the elephants there are trees.

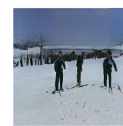

Here we can see three persons are skating on the snow with ski boards. They wear a helmet and he has goggles. In the background there is a sky.

Figure 11. Generating examples on LN-COCO dataset.

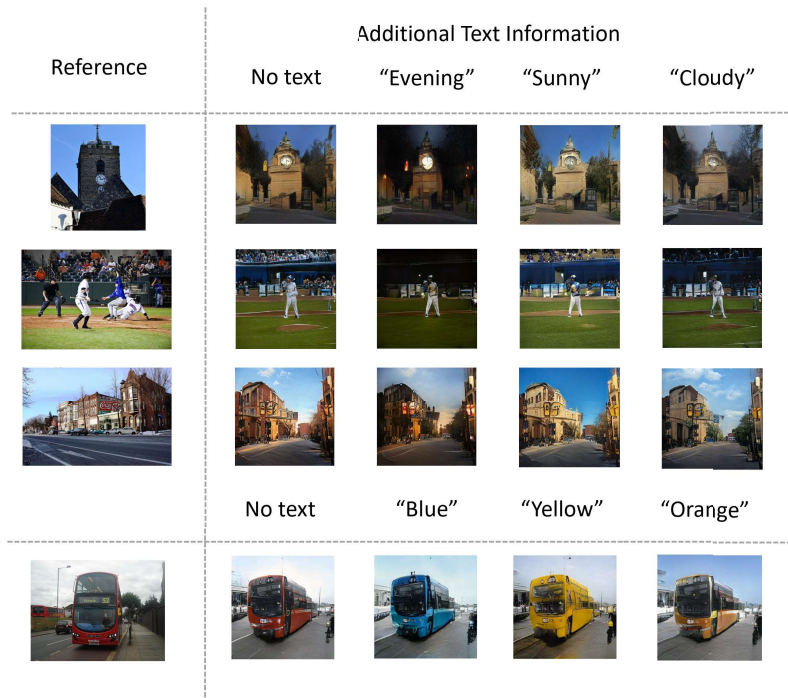

Figure 12. Generating images with multi-modal conditions (conditioned on both image and text) on MS-COCO dataset.

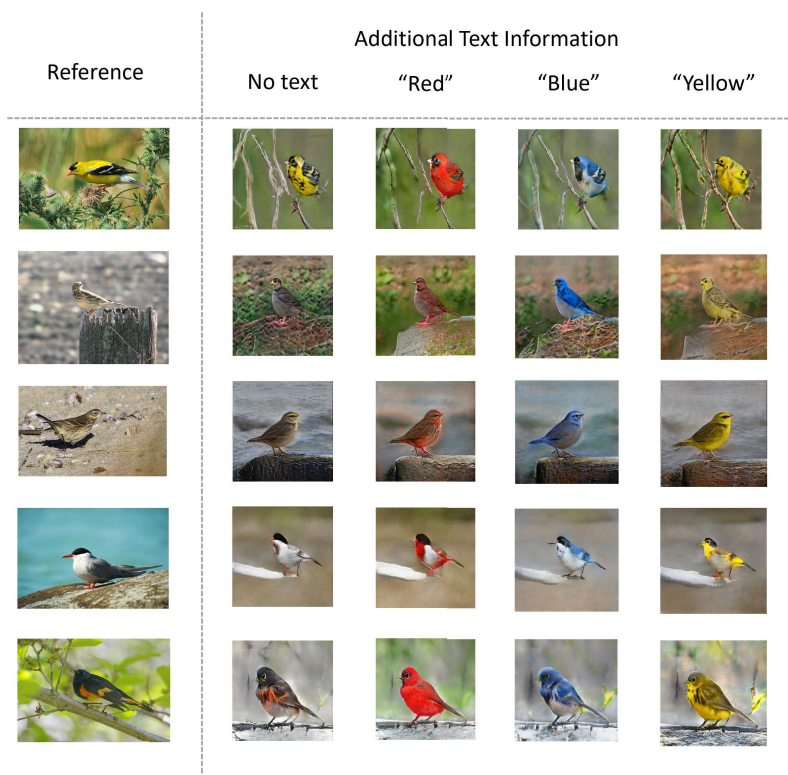

Figure 13. Generating images with multi-modal conditions (conditioned on both image and text) on CUB dataset.



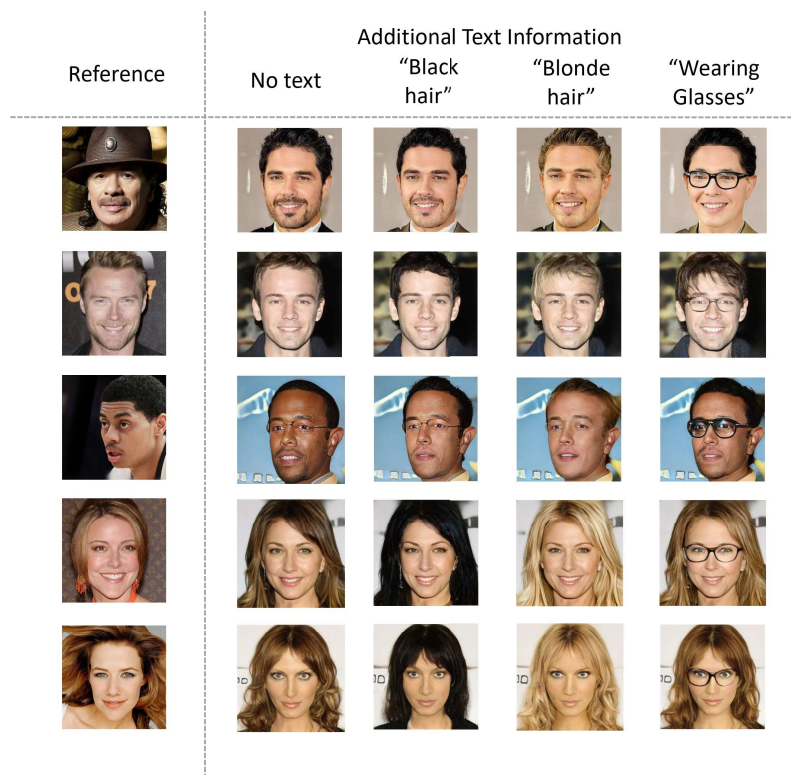

Figure 14. Generating images with multi-modal conditions (conditioned on both image and text) on MM CelebA-HQ dataset.

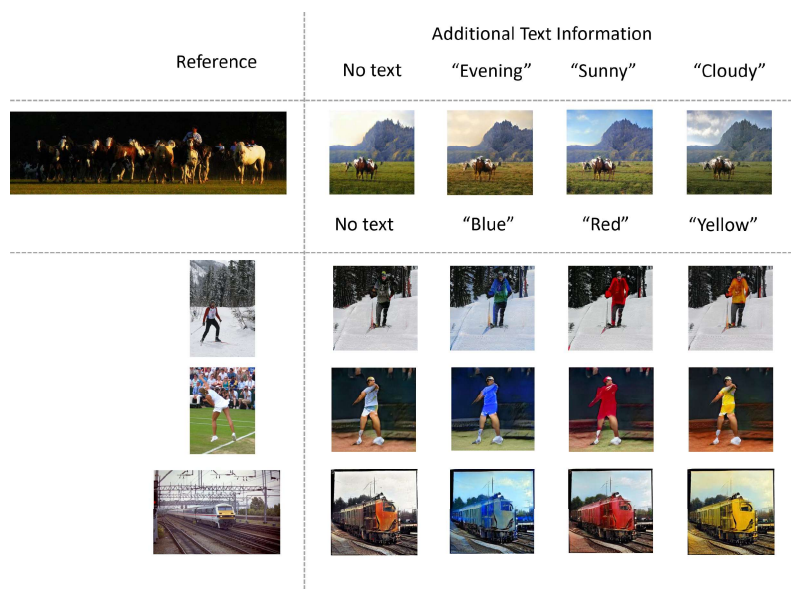

Figure 15. Generating images with multi-modal conditions (conditioned on both image and text) on LN-COCO dataset.
